1 **Effect of sinusoidal electrical cortical stimulation on brain cells**

2

3 Seungjun Ryu<sup>a†</sup>, Kyung-Tai Kim<sup>b†</sup>, Hyeon Seo<sup>c†</sup>, Jongwook Cho<sup>a</sup>, Jiyoung Park<sup>a</sup>, Sung Chan Jun<sup>d</sup>,

4 Hyoung-Ihl Kim<sup>a</sup>

5

6 <sup>a</sup>Department of Biomedical and Science and Engineering, Institute of Integrated Technology,

7 Gwangju Institute of Science and Technology, Gwangju 61005, Korea

8 <sup>b</sup>Jeonbuk Department of Inhalation Research, Korea Institute of Toxicology, 30 Baekhak1-gil,

9 Jeongeup, Jeollabuk-do 56212, Republic of Korea

10 <sup>c</sup>Medical Device Development Center, Daegu-Gyeongbuk Medical Innovation Foundation, 41061,

11 Daegu, Korea

12 <sup>d</sup>School of Electrical Engineering and Computer Science, Gwangju Institute of Science and

13 Technology, Gwangju 61005, Korea

14

15 †These authors have contributed equally to this work

16 Correspondence: Hyoung-Ihl Kim

17 Department of Biomedical and Science and Engineering, Institute of Integrated Technology, Gwangju

18 Institute of Science and Technology, Gwangju 61005, Korea

19 Tel:82-62-715-5302

20 Fax:82-62-715-5309

21 E-mail: [hyoungihl@gist.ac.kr](mailto:hyoungihl@gist.ac.kr)

22

23 Email addresses for coauthors:

24 Seungjun Ryu: [perao123@gist.ac.kr](mailto:perao123@gist.ac.kr)

25 Kyung-Tai Kim: [kyungtai.kim@kitox.re.kr](mailto:kyungtai.kim@kitox.re.kr)

26 Hyeon Seo: [hseo0612@gmail.com](mailto:hseo0612@gmail.com)

27 Jongwook Cho: chojw@gist.ac.kr

28 Jiyoung Park: mimi73@gist.ac.kr

29 Sung Chan Jun: sejun@gist.ac.kr

30

31 **Abbreviations list**

32 AP, action potential; CaMKII, calmodulin-dependent protein kinase II; CSF, cerebrospinal fluid; EBS,

33 electrical brain stimulation; PV, parvalbumin; tDCS, transcranial direct current stimulation

34

35 **ABSTRACT**

36 **Background:** Electrical cortical stimulation is often used in patients with neurological disorders but it  
37 is unclear how it modulates different types of brain cells.

38 **Objective:** The aim of this study was to determine the effect of sinusoidal electrical brain stimulation  
39 (SEBS) on different types of brain cells and to identify the exact types of brain cells that are  
40 stimulated.

41 **Methods:** The study subjects were 40 male Sprague Dawley rats (weight 300–350 g; age 9 weeks).  
42 SEBS was delivered continuously at frequencies of 20, 40, 60, or 100 Hz to the sensory parietal  
43 cortex using epidurally placed electrodes for 1 week. Transverse rat brain tissue sections were  
44 immunolabeled with calmodulin-dependent protein kinase II and parvalbumin (PV) antibodies and  
45 with c-Fos for counting of activated excitatory and inhibitory neurons. Computer simulation was  
46 performed to cross-validate the frequency-specific cell stimulation results.

47 **Results:** Inhibitory neurons were more excited than excitatory neurons after epidural EBS. Most  
48 excitatory neural activity was evoked at 40 Hz ( $p < 0.05$ ) and most inhibitory neuronal activity was  
49 evoked at 20 Hz ( $p < 0.01$ ). The contralateral sensory cortex was activated significantly more at 40 Hz  
50 ( $p < 0.05$ ) and the corticothalamic circuit at 20 Hz ( $p < 0.001$ ). Stimulation-induced excitatory and  
51 inhibitory neuronal activation was widest at 20 Hz.

52 **Conclusions:** Epidural electrical stimulation targets both excitatory and inhibitory neurons and the  
53 related neural circuits. Further exploration is needed to identify circuits that promote the plasticity  
54 needed for recovery in patients with specific neurological diseases.

55

56 **Keywords:** brain stimulation, sine waveform, inhibitory neuron, excitatory neuron, biocomputation

57

## 58 INTRODUCTION

59 Electrical brain stimulation (EBS) is a type of electrotherapy that modulates neuronal activity using a  
60 controlled electric current and is increasingly used alone or in combination with other clinical therapy  
61 for various neurological disorders, such as essential tremor [1, 2], epilepsy [3, 4], Parkinson's disease  
62 [5, 6], chronic pain [7], depression [8], cerebral infarction, and other brain disorders [9, 10].

63 Essentially, EBS generates an electrical field that affects specific populations of neurons. Numerous  
64 researchers have attempted to determine how this electrical field influences neural activity in local  
65 and remote neural circuits and the casual relationship with the resulting behavioral changes. However,  
66 there are many different types of neuronal cells that are under the influence of specific  
67 neurotransmitters, and it is still unclear exactly how EBS works.

68 The specific function triggered when a neural circuit is stimulated depends on the type of brain cell  
69 involved. Each type of neuron has a specific modulatory effect, such as post-synaptic excitation or  
70 inhibition, and the different types of neuron are interconnected. Several studies have shown that the  
71 efficacy of transmission at the synapse can undergo a short-term increase (known as facilitation) or  
72 decrease (depression) according to the activity of the presynaptic neuron [11-14]. However, previous  
73 studies of the mechanism of EBS have usually focused on the function of pyramidal neurons [15-18],  
74 given that they are assumed to play a key role in activation of neural activity and the associated  
75 plasticity in the stimulated cortex. Although recent studies have shown that excitatory neurons are  
76 strongly regulated by inhibitory neurons via feed-forward and feedback mechanisms [19, 20], the type  
77 of cells most influenced by EBS is still unknown [21-23].

78 The basic mechanisms underlying EBS include functional reorganization of neural structures,  
79 substrates, and increased synaptic plasticity, which are modified by various factors, such as the  
80 stimulation type and parameter, and current brain status [24-26]. Recently, transcranial alternating  
81 current stimulation (tACS) has become popular because it shows entrainment of brain oscillations in a  
82 frequency-specific manner and can be administered using various parameters, including sinusoidal

83 weak intensity stimulation [23], but there is doubt regarding their effectiveness [27]. And also, there  
84 remain many uncertainties regarding the interaction between neural excitability and strong sinusoidal  
85 stimulation.

86 The aim of this study was to identify the neural cell populations that are activated during SEBS.  
87 Computational models were incorporated to clarify the effect of SEBS on the relationship between the  
88 spatial distribution of a stimulus-induced electrical field and activation of individual neurons and how  
89 it alters neuronal spiking.

90

## 91 **MATERIAL AND METHODS**

### 92 **Experimental animals**

93 Forty male Sprague Dawley rats (300–350 g, aged 9 weeks) were used in the study. All experiments  
94 were performed in accordance with the ARRIVE guidelines and the institutional guidelines of the  
95 Gwangju Institute of Science and Technology (GIST). All procedures were approved by the  
96 Institutional Animal Care and Use Committee at GIST. The rats were divided into four experimental  
97 groups (to receive SEBS at 20, 40, 60, or 100 Hz) and a sham operation group. At least 5 rats were  
98 included in each study group.

### 99 **Surgical procedures**

100 The rats were anesthetized using a mixture of ketamine hydrochloride 100 mg/kg and xylazine 7  
101 mg/kg. After 15 minutes, the rats were fixed in a small-animal stereotactic frame. Body temperature  
102 was maintained at  $37.5 \pm 5^\circ\text{C}$  with a thermocouple blanket. With bregma (B) and lambda (L) in a flat  
103 plane as reference points, a small craniectomy was performed 3 mm posterior to bregma and 3 mm  
104 lateral to the midline. All 40 rats underwent insertion of a custom-made electrode (diameter 3 mm,  
105 height 0.37 mm) via craniotomy in the epidural area, with a 0.7-mm-diameter reference screw  
106 electrode placed 2 mm anterior to bregma and 3 mm lateral to the midline. The electrode extended  
107 from 1.5 mm to 4.5 mm posteriorly and 1.5 mm to 4.5 mm lateral to bregma ( $9 \text{ mm}^2$ ), covering the

108 hindlimb, trunk, and forelimb areas of the sensory cortex. The electrodes were connected to a pedestal  
109 on the skull, fixed and sealed with bone cement, and then connected to a stimulator (Cybermedic Co.  
110 Ltd., Iksan, Korea) via a swivel adaptor at the top of the cage.

### 111 **Electrical stimulation**

112 Voltage stimulation was delivered continuously (24 h/day) to the sensory cortex via a programmable  
113 Cybermedic stimulator for 1 week. We maintained the experimental stimulation intensity at half of the  
114 individual movement threshold. On alternate days, we measured the individual motor threshold during  
115 stimulation and regulated the voltage. The experimental stimulation intensities ranged from 1.0 V to  
116 3.0 V and frequencies of 20, 40, 60, and 100 Hz were used to investigate differential stimulation of  
117 neuronal cells. A continuous sinusoidal waveform with a duty cycle of 99% was maintained for all  
118 animals in each of the experimental groups (Fig. 1A).

### 119 **Neurohistological analysis**

#### 120 Immunohistochemistry

121 All rats in each group were euthanized and processed for c-Fos immunohistochemistry after 1 week of  
122 cortical stimulation. Immunohistochemistry was performed as described previously [28]. Briefly, rats  
123 were perfused with 4% paraformaldehyde (PFA), post-fixed in 4% PFA overnight, and the brains were  
124 sunk to 30% sucrose for cryoprotection. Coronal brain sections (40 $\mu$ m) were performed using  
125 microtome. Rat brain sections were incubated with following antibodies: rabbit anti-c-Fos (1:1000)  
126 (Cell Signaling, 2250S), Mouse anti-CamKII (Abcam, ab22609), Guinea pig anti-parvalbumin  
127 (Synaptic systems, 195 004), goat anti-guinea pig alexa 555 (1:200) (Invitrogen, A21435). Proper  
128 fluorophore-conjugated secondary antibody (Invitrogen) was used and images were captured using  
129 LSM-800 confocal microscope (Zeiss).

130 For DAB staining, the brain sections were treated with 3% H<sub>2</sub>O<sub>2</sub> in Tris-buffered saline and 1%  
131 normal goat serum and then incubated in c-Fos 9F6 rabbit antibody (Cell Signaling Technology). The  
132 sections were incubated in a Polink-1 horseradish peroxidase detection system for rabbit antibody

133 (GBI Labs, Mukilteo, WA, USA) on the following day. After a color reaction was observed on  
134 incubating sections with diaminobenzidine/peroxidase solution (DAB 0.02%; 0.08% nickel sulfate) in  
135 Tris-buffered saline, the brain sections were mounted on gelatin-coated slides. c-Fos images were  
136 captured using a Leica microscope.

137 c-Fos mapping

138 Fast Fourier transform-bandpass filtered images were created in ImageJ (National Institutes of Health,  
139 Bethesda, MD, USA) and cell density maps using a custom MATLAB-based program (MathWorks,  
140 Natick, MA, USA) [29]. A sample image showing the results of the transfer function when applied is  
141 shown in Fig. 1B. Regions of interest were selected on the motor and sensory cortices, striatum, and  
142 thalamus, and the number of c-Fos-positive cells in each region of interest was counted automatically  
143 by calculating the mean image pixel intensity and applying a threshold, with validation by  
144 microscopic counting.

145 Quantification

146 To quantify activated excitatory or inhibitory neurons in rat cortex, 40  $\mu\text{m}$ -thick transverse sections of  
147 were immunolabeled with c-Fos, PV, CamKII antibodies and counted the number of double positive  
148 cells (activated excitatory neurons: c-Fos and CamKII, activated inhibitory neurons: c-Fos and PV).  
149 At least 4 brains were analyzed for each group. All quantifications in images were analyzed in ImageJ  
150 software.

151 **Statistical analysis**

152 The study data were analyzed using OriginPro version 9.1 software (OriginLab, Northampton, MA,  
153 USA). The data were assessed for normality using the Kolmogorov-Smirnov test. The numbers of  
154 cells expressing c-Fos were then compared between the study groups using one-way analyses of  
155 variance. The Bonferroni post-hoc test was used to detect significant differences between groups for  
156 each region of interest and specific cell type. If no significant differences were detected, Kruskal-  
157 Wallis one-way analysis of variance by ranks with Dunn's method was used to compare the specific

158 numbers of cells co-labeled with c-Fos between the study groups and for post hoc comparison. A *p*-  
159 value <0.05 was considered statistically significant.

## 160 **Computational simulation**

161 Stimulus-induced potential field

162 We constructed a three-dimensional finite element model of a rat head using computed tomography  
163 images of a rat. The rat brain imaging was performed using a volumetric micro-CT scanner (NFR  
164 Polaris G90C; NanoFocusRay, Ikson, Korea). The image size was 1024×1024 pixels with 434 slices  
165 and the voxel size was 0.0698×0.0698×0.1396 mm<sup>3</sup>. Manual segmentation was performed using  
166 Seg3d to guarantee continuity and to improve the accuracy of segmentation. The model consisted of  
167 the scalp, skull, and cerebrospinal fluid (CSF); we included the brain after shrinking the CSF layer by  
168 5 mm. The electrodes were modeled in accordance with the surgical procedures. The rat head model  
169 was generated by an optimized tetrahedral mesh using Iso2Mesh toolbox [30], TetGen [31], and  
170 MATLAB.

171 The electrical properties of each tissue, taken from averaged human conductivity values, were  
172 assigned as follows (S/m): skin, 0.45; skull, 0.01; CSF, 1.65; brain, 0.2; and electrode, 5.5e07. The  
173 potential field were calculated by solving the quasi-static Laplace equation via COMSOL  
174 Multiphysics (v5.3, COMSOL. Inc., Burlington, MA, USA) using the finite element method. We  
175 applied the conjugate gradient method with preconditioning of an algebraic multigrid (relative  
176 tolerance, 1×10<sup>-6</sup>; Fig. 2)

177 Neuronal responses to the electrical field

178 Single-compartment models with Hodgkin-Huxley properties were modified to represent regular  
179 spiking excitatory neurons and fast spiking interneurons [22]. The constants and parameters were  
180 unchanged from the original models, which resulted in different firing patterns with respect to various  
181 frequencies and the strength of sinusoidal stimulation. The neuronal models were implemented in  
182 NEURON [32].



183 To simulate neuronal responses according to the predicted potential distributions calculated in the rat  
184 head model, we constructed a multi-scale model that virtually combined the single-compartment  
185 neuronal models with the rat head model [33, 34]. The multi-scale model consisted of the following  
186 two-step process. First, the excitatory and inhibitory neurons were distributed on the cortical surface.  
187 Second, the external stimulus calculated using the rat head model was applied to neuronal models.  
188 Therefore, the external input  $I(t) = I_0 f(t)$  was added to the cable model where  $I_0 = \partial^2 V / \partial s^2$   
189 approximates the amplitude of the stimulus-induced transmembrane current and  $f(t)$  represents the  
190 pulse waveform. The amplitude of the extra current  $I_0$  is determined by an “activating function” that  
191 evokes activation of neuronal models [35].  $S$  is the direction that is locally parallel with the fiber, and  
192 we assumed the fiber direction to be the normal direction of the close element comprising the cortical  
193 surface. The  $I_0$  was calculated at each neuron’s position in the rat head model using COMSOL with  
194 MATLAB. For the waveform, we simulated continuous sinusoidal stimulation at 20, 40, 60, 80, and  
195 100 Hz in accordance with the animal experiment.

196

## 197 **RESULTS**

### 198 **Quantification of neuronal activity from expression of c-Fos after SEBS**

199 c-Fos is an immediate-early gene that responds transiently and rapidly to various stimuli and is a good  
200 marker of neuronal activation in the brain [36]. To identify neuronal activation by SEBS in the rat  
201 brain, we performed SEBS at various frequencies (20, 40, 60, and 100 Hz) 24 h/day for 1 week (Fig.  
202 1A). The immunoreactivity of c-Fos shows the neuronal activation density map at two different  
203 bregma levels after SEBS at 20, 40, 60, and 100 Hz in the experimental groups and in the sham group  
204 (Fig. 3A). Activation of c-Fos by SEBS was propagated to various brain regions including not only  
205 the motor and sensory cortices but also the deeper brain, including the striatum and thalamus. To  
206 elucidate the neuronal activation in the various regions, we performed automated c-Fos positive cell  
207 counts in four regions of interest (motor cortex, sensory cortex, striatum, thalamus) among the groups  
208 (Table S1). SEBS at 40 Hz resulted in the highest significant increment of c-Fos-positive cell count in

209 the contralateral sensory cortex ( $p<0.05$ ). In the 20 Hz SEBS group, activation was highest in the  
210 thalamus ( $p<0.001$ ). Regardless of frequency, the increments in neuronal activity were significantly  
211 greater in the EBS groups than in the sham group (Fig. 3B, Table S1).

212

### 213 **Quantification of sensory cortical cell type-specific activity using co-labeling with c-Fos** 214 **expression after SEBS**

215 Excitatory/inhibitory balance is required for correct functioning of the brain. Because SEBS  
216 modulates the excitatory/inhibitory neuronal balance, it has been applied as effective treatment for  
217 various neurological disorders [37-39]. To elucidate the functional mechanism of SEBS, we  
218 investigated the types of neuronal cells that are activated after SEBS. Immunohistochemistry was  
219 performed with calmodulin-dependent protein kinase II (CaMKII) antibody for excitatory neurons and  
220 PV antibody for inhibitory neurons. Activated inhibitory neurons ( $PV^+$ ,  $c-Fos^+$ ) and excitatory neurons  
221 ( $CaMKII^+$ ,  $c-Fos^+$ ) were analyzed (Fig. 4).

222 20Hz SEBS markedly improved the activity of inhibitory neurons in both cortices but not that of  
223 excitatory neurons when compared with the sham group (ipsilateral side;  $86.98\pm 2.12\%$ ,  $p<0.001$ ;  
224 contralateral side;  $80.54\pm 8.88\%$ ,  $p<0.001$ ). Even though 40Hz and 60Hz SEBS increased the activity  
225 of inhibitory neurons, excitatory neurons were more activated than those in the sham group (40 Hz on  
226 ipsilateral side,  $59.82\pm 3.25\%$ ,  $p<0.001$ ; 40 Hz on contralateral side,  $54.22\pm 3.29\%$ ,  $p<0.01$ ; 60 Hz on  
227 ipsilateral side,  $49.54\pm 4.70\%$ ,  $p<0.05$ ; 60 Hz on contralateral side,  $51.30\pm 2.26\%$ ,  $p=0.09$ ; Fig. 4C).

228 We also calculated the normalized ratio from the average value in the sham group to compare the  
229 excitatory and inhibitory neurons at each frequency (Fig. 4D) and specific regional neurons between  
230 three different frequencies (Fig. 4E). The activity of inhibitory neurons was markedly increased by  
231 20Hz SEBS when compared with the activity of excitatory neurons (ipsilateral side,  $3.49\pm 0.09$  and  
232  $1.04\pm 0.08$ , respectively,  $p<0.001$ ; contralateral side,  $2.41\pm 0.27$  and  $0.87\pm 0.08$ ,  $p<0.001$ ). The activity  
233 of inhibitory neurons was increased by 40Hz and 60Hz SEBS; however, the increase was only

234 statistically significant on the contralateral side (40 Hz on ipsilateral side,  $1.98 \pm 0.29$  and  $1.87 \pm 0.10$ ;  
235 40Hz on contralateral side,  $1.91 \pm 0.14$  and  $1.46 \pm 0.09$ ,  $p < 0.05$ ; 60 Hz on ipsilateral side,  $2.03 \pm 0.19$  and  
236  $1.55 \pm 0.15$ ; 60Hz on contralateral side,  $1.86 \pm 0.19$  and  $1.35 \pm 0.08$ ,  $p < 0.05$ ; Fig. 4D).

237 The activity of excitatory neurons that received 40Hz and 60Hz SEBS was significantly greater than  
238 that of excitatory neurons that received 20Hz SEBS on both the ipsilateral and contralateral sides  
239 ( $p < 0.05$  and  $p < 0.05$ , respectively); however, the activity of inhibitory neurons was significantly  
240 greater in response to 20Hz SEBS than in response to 40Hz and 60Hz SEBS only on the ipsilateral  
241 side ( $p < 0.01$ ; Fig. 4E)

242 CaMKII-positive excitatory neurons were predominantly located in layers 2/3 and 6 but PV-positive  
243 inhibitory neurons were mainly found in layers 4 and 5 [40, 41]. We quantified the number of neurons  
244 activated according to the cortical layer in which they were located by dividing the cortex into 10 bins  
245 (Supplementary Fig. 2A, 2B). We found that 40Hz SEBS activated excitatory neurons in the whole  
246 cortical layer but that 60Hz SEBS only activated neurons in layers 2/3 and 6. Although 20Hz SEBS  
247 did not activate excitatory neurons, it activated inhibitory neurons in the entire cortical layer, and 40-  
248 Hz and 60-Hz SEBS activated inhibitory neurons in the deeper layer (Supplementary Fig. 2C, 2D).

#### 249 **Computational simulation for observing the effect of SEBS on geometrical and neuronal** 250 **responses at different frequencies**

251 We performed computational simulation to identify the geometrical impact of SEBS on activation of  
252 neurons and their firing rate. First, the current density induced by a 1-V stimulus amplitude was  
253 computed (Fig. 5). As expected, there was a higher current density in the CSF because of higher  
254 conductivity, and the current density was strongest in the brain area directly beneath the electrode. A  
255 high current density is observed at the edge of the active electrode because of the edge effect whereas  
256 the reference electrode has less of an edge effect because it is smaller. Second, in order to elucidate  
257 the functional mechanism of different excitatory/inhibitory neuronal activation by SEBS, we  
258 simulated single neuron responses by increasing the external stimulus. The action potentials (APs)

259 efficiency, which is the percentage of action potentials per stimulation pulse, is shown in Fig. 6, and  
260 clearly shows the firing patterns. Generally, there was no firing for a lower stimulus amplitude with a  
261 higher stimulus frequency and there was burst firing for a stronger stimulus amplitude with a lower  
262 stimulus frequency. Following current-controlled stimulation, phase-locked firing patterns were  
263 frequently observed in both inhibitory and excitatory neuron models. The stimulus amplitude needed  
264 to evoke APs was lower for inhibitory neurons than for excitatory neurons. Third, we coupled  
265 individual neurons to spatial patterns of a stimulus-induced current field calculated using a rat head  
266 model (Fig. 7). Consistent with the spatial distributions of current density shown in Fig. 5, the neurons  
267 were activated directly beneath the electrodes regardless of stimulus frequency and type of neuronal  
268 model. Inhibitory neurons were more strongly activated than excitatory neurons because of intrinsic  
269 differences between these two types of neurons. The stimulus amplitude needed to evoke neuronal  
270 activation increased monotonically with stimulus frequency; therefore, 20-Hz SEBS induced the  
271 strongest activation in both inhibitory and excitatory neurons, with shrinking of the activated area as  
272 the frequency increased (Fig. 7).

273

## 274 **DISCUSSION**

275 The precise mechanism underlying neuronal activation by SEBS is not well understood. Electrical  
276 stimulation of the sensory and motor cortex usually focus on selective stimulation of cortical  
277 pyramidal cells because pyramidal neurons are known to be the primary activators of the corticospinal  
278 tract and may provide the main input to the direct pathway [42, 43]. Based on experimental results  
279 showing higher activation in inhibitory neurons [15, 44], the possibility of cell type-specific  
280 individual neuron responses being a bridge to interpolation of neural networks has been raised.

281 To improve our understanding of this mechanism, we performed an animal experiment and  
282 biocomputation. Synaptic connectivity and the strength of individual neurons are usually assessed by  
283 intracellular recordings; however, it is impractical to record data for all neurons within a neural circuit.  
284 As an alternative, we observed the firing properties of the neural circuit by eliciting a response in

285 individual pyramidal cells and interneurons displaying a diverse activation pattern, reflecting their  
286 anatomical structure using a computational study.

### 287 **Neuronal responses in vivo**

288 Our experimental study revealed expression of c-Fos, which represents neuronal activity [36], to be  
289 higher in all of the SEBS groups than in the sham group. Cell type-specific analysis showed that  
290 neuronal activity was stronger in PV+ interneurons, regardless of type of SEBS, than in the sham  
291 group. This is consistent with a previous result for transcranial direct current stimulation (tDCS),  
292 which predominantly modulates interneurons [45]. Interneurons are primarily inhibitory in the central  
293 nervous system and their main role is to conduct flow of neuronal signals between a motor neuron or  
294 sensory neuron in a neural circuit. PV interneurons are crucial when performing high-order functions  
295 such as learning and decision-making and also regulate the activity of pyramidal neurons [46].  
296 Therefore, our findings afford a clue for understanding the effect of current SEBS, such as tACS, in  
297 specific neuronal diseases.

298 SEBS of the sensory parietal cortex and motor cortex enhanced neural activity locally beneath the  
299 area of the electrical field, unlike at the striatum and thalamus, which were distant from the  
300 electromagnetic field used in our experiments. SEBS differentially affects the local electromagnetic  
301 strength at the circuit level. Thalamic activation was greater at 20 Hz than at other frequencies. These  
302 findings suggest that a neural circuit, e.g., the cortico-striatal-thalamic circuit of the salience network  
303 or the corticothalamic circuit, will also be influenced by SEBS. This modulation of circuitry could  
304 represent additional clue for therapeutic intervention.

305 The effects of EBS were divided into those that occurred during stimulation and those that occurred  
306 after stimulation. Those that occur during stimulation are solely dependent on changes in the  
307 membrane potential while those that occur after stimulation depend on membrane depolarization [15]  
308 and synaptic modulation [47]. The aftereffects of cathodal tDCS depend on modulation of  
309 glutamatergic synapses [15]. The mechanism of action of SEBS in the context of specific neurons

310 could be different from the simple summation of anodal and cathodal tDCS effects The phenotypic  
311 effect is represented as the balance of excitatory and inhibitory neuronal responses. Our simulation  
312 results showed that 20Hz SEBS evokes the strongest inhibitory and excitatory neuronal responses in  
313 both model of rat and human brain (Fig. 7, Supplementary Fig. 1). Since the inhibitory neuronal  
314 simulation responses are much larger than excitatory simulation neuronal responses in the group that  
315 received 20Hz SEBS, our clinical findings can be interpreted as meaning that stronger inhibitory  
316 neuronal responses occurred in the group that received 20Hz SEBS (Fig. 4D) and that excitatory  
317 neuronal activity occurred in the groups that received 40Hz or 60Hz SEBS (Fig. 4E).

### 318 **Individual neuronal responses in silico**

319 We simulated the activation of an inhibitory and excitatory neuron model by extracellular stimulation  
320 and examined the relationship between the neuronal firing profile and stimulus frequency in respect to  
321 realistic stimulus-induced field distributions. We found neuronal excitability to be reduced in response  
322 to a strong stimulus frequency and inhibitory neurons were more sensitive than excitatory neurons to  
323 sinusoidal stimulation.

324 We adapted an established model of excitatory and inhibitory neurons from Mahmud et al [22]. In  
325 their model, an applied extracellular stimulation current was calculated by a derivative of potential  
326 field, which can be interpreted by intracellular current stimulation. In our study, as an alternative, we  
327 adjusted the stimulus amplitude via the activating function calculated using the simulated current field  
328 in the rat head model. Therefore, we were able to take into account the neuron's location relative to  
329 the electrodes, which may be an important determinant of neuronal polarization [48].

330 Additionally we simulated the spatial distribution of the firing rate using a human head model to  
331 investigate the impact of the complex geometry of the human brain on neuronal activation, as  
332 depicted in Supplementary Fig. S1. We used a previously developed human head model [48, 49] and  
333 coupled it to the same type of neuronal model in the rat head. As we placed the reference electrode on  
334 the chest far from the active electrode for the human model, the activation of neurons was restricted to

335 the area of the sensory cortex directly beneath the electrode. The complex patterns reflecting the  
336 complex anatomy of the brain were observed to result in activations in the sulcal wall. As expected, a  
337 20-Hz sinusoidal stimulation produced the largest areas of activation and the stimulus threshold was  
338 lower for inhibitory neurons than for excitatory neurons (Fig. 7 and Supplementary Fig. S1).

339 Most computational approaches have presented neuronal excitability with sinusoidal stimulation  
340 subject to a uniform electric field. Aspart et al reported a frequency-dependent polarization profile  
341 using a biophysically detailed model of pyramidal neurons in response to a weak uniform electric  
342 field [50]. Yi et al suggested that the geometric features of a neuron model play a crucial role in  
343 determining the polarization when using a two-compartment neuron model with a uniform electric  
344 field [51]. Thus, in the future, we need to achieve morphological features of neuronal models for  
345 precise simulation; however, while most simulation studies investigating neuronal activation involve  
346 intracellular or extracellular stimulation with a uniform electric field, we propose a multi-scale model  
347 and thus we could consider extracellular field induced in the brain by the stimulating electrodes.

348 This study has some limitations. First, c-Fos activation reflects rapid responses after SEBS. In this  
349 study, SEBS was performed for 1 week, so measurement of c-Fos cannot fully represent the neuronal  
350 responses that occur with long-term SEBS. However, 1 week of SEBS can modulate synapses at the  
351 neuronal circuit level and we assume that our c-Fos density mapping shows the chronic effects of  
352 SEBS. Second, the translation of individual neuronal responses into oscillations at the network level is  
353 not trivial. However, modulation of individual neurons may provide evidence of entrainment of neural  
354 oscillations at the network level through which neurons are recruited by sinusoidal stimulation. Future  
355 studies should incorporate synaptic connections, which may allow more precise and effective  
356 application of epidural EBS in both the clinical and basic research settings.

357

358

359

360

361 **CONCLUSION**

362 We examined the change in stimulation parameters when stimulating brain cells and the quantity of  
363 each component of brain cells to determine which cells are differentially influenced after delivering  
364 cortical stimulation. Our findings were derived from in vivo and in silico experiments and analyzed in  
365 an integrated manner. We found that 20-Hz SEBS is the most effective frequency for selective  
366 inhibitory cortical stimulation and that 40-Hz SEBS is the most effective frequency for selective  
367 excitatory cortical stimulation. We assumed the mechanism involves computational simulation  
368 whereby 20-Hz SEBS differentially stimulates inhibitory neurons and inhibits excitatory neurons  
369 sequentially. In order to obtain a functional effect by applying SEBS clinically, it is necessary to  
370 consider the effect of SEBS on specific neurons and neuronal circuits in specific neurological  
371 disorders.

372 **Acknowledgments**

373 The authors are grateful to Professor MC Lee for his enthusiastic discussion about differential cell  
374 counting based on his neuropathologic knowledge.

375 **Funding**

376 This work was supported by the Basic Science Research Program through the National Research  
377 Foundation of Korea funded by the Ministry of Science and ICT (NRF-2016R1A2B3009660, NRF-  
378 2019M3C1B8090841, and NRF-2018R1D1A1B07041224)

379 **Declarations of interest**

380 None.

381 **Data statement**

382 The datasets generated and analyzed during the current study are available from the corresponding  
383 author on reasonable request.

384



385

386

387

388

389 **References**

- 390 [1] Benabid AL, Pollak P, Hoffmann D, Gervason C, Hommel M, Perret J, et al. Long-  
391 term suppression of tremor by chronic stimulation of the ventral intermediate thalamic  
392 nucleus. *The Lancet* 1991;337(8738):403-6.
- 393 [2] Hubble J, Busenbark K, Wilkinson S, Penn R, Lyons K, Koller W. Deep brain  
394 stimulation for essential tremor. *Neurology* 1996;46(4):1150-3.
- 395 [3] Fisher RS, Velasco AL. Electrical brain stimulation for epilepsy. *Nature Reviews*  
396 *Neurology* 2014;10(5):261.
- 397 [4] Fish D, Gloor P, Quesney F, Oliver A. Clinical responses to electrical brain  
398 stimulation of the temporal and frontal lobes in patients with epilepsy: pathophysiological  
399 implications. *Brain* 1993;116(2):397-414.
- 400 [5] Group D-BSfPsDS. Deep-brain stimulation of the subthalamic nucleus or the pars  
401 interna of the globus pallidus in Parkinson's disease. *N Engl J Med* 2001;345(13):956-63.
- 402 [6] Benabid AL. Deep brain stimulation for Parkinson's disease. *Curr Opin Neurobiol*  
403 2003;13(6):696-706.
- 404 [7] O'connell NE, Marston L, Spencer S, DeSouza LH, Wand BM. Non-invasive brain  
405 stimulation techniques for chronic pain. *Cochrane Database Syst Rev* 2018(3).
- 406 [8] Mayberg HS, Lozano AM, Voon V, McNeely HE, Seminowicz D, Hamani C, et al.  
407 Deep brain stimulation for treatment-resistant depression. *Neuron* 2005;45(5):651-60.
- 408 [9] Kim RG, Cho J, Ree J, Kim H-S, Rosa-Neto P, Kim J-M, et al. Sensory-parietal  
409 cortical stimulation improves motor recovery in severe capsular infarct. *J Cereb Blood Flow*  
410 *Metab* 2016;36(12):2211-22.
- 411 [10] Webster BR, Celnik PA, Cohen LG. Noninvasive brain stimulation in stroke  
412 rehabilitation. *NeuroRx* 2006;3(4):474-81.
- 413 [11] Regehr WG. Short-term presynaptic plasticity. *Cold Spring Harb Perspect Biol*  
414 2012;4(7):a005702.
- 415 [12] Nadim F, Manor Y. The role of short-term synaptic dynamics in motor control. *Curr*  
416 *Opin Neurobiol* 2000;10(6):683-90.
- 417 [13] Dittman JS, Kreitzer AC, Regehr WG. Interplay between facilitation, depression, and  
418 residual calcium at three presynaptic terminals. *J Neurosci* 2000;20(4):1374-85.
- 419 [14] Jackman SL, Regehr WG. The mechanisms and functions of synaptic facilitation.  
420 *Neuron* 2017;94(3):447-64.
- 421 [15] Nitsche M, Fricke K, Henschke U, Schlitterlau A, Liebetanz D, Lang N, et al.  
422 Pharmacological modulation of cortical excitability shifts induced by transcranial direct  
423 current stimulation in humans. *The Journal of physiology* 2003;553(1):293-301.
- 424 [16] Schulz R, Gerloff C, Hummel FC. Non-invasive brain stimulation in neurological

- 425 diseases. *Neuropharmacology* 2013;64:579-87.
- 426 [17] Delvendahl I, Gattinger N, Berger T, Gleich B, Siebner HR, Mall V. The role of pulse  
427 shape in motor cortex transcranial magnetic stimulation using full-sine stimuli. *PLoS One*  
428 2014;9(12):e115247.
- 429 [18] Kim Y-H, You SH, Ko M-H, Park J-W, Lee KH, Jang SH, et al. Repetitive  
430 transcranial magnetic stimulation-induced corticomotor excitability and associated motor  
431 skill acquisition in chronic stroke. *Stroke* 2006;37(6):1471-6.
- 432 [19] Maffei A, Nelson SB, Turrigiano GG. Selective reconfiguration of layer 4 visual  
433 cortical circuitry by visual deprivation. *Nat Neurosci* 2004;7(12):1353.
- 434 [20] Bannister AP. Inter- and intra-laminar connections of pyramidal cells in the neocortex.  
435 *Neurosci Res* 2005;53(2):95-103.
- 436 [21] Antal A, Paulus W. Transcranial alternating current stimulation (tACS). *Front Hum*  
437 *Neurosci* 2013;7:317.
- 438 [22] Mahmud M, Vassanelli S. Differential Modulation of Excitatory and Inhibitory  
439 Neurons during Periodic Stimulation. *Front Neurosci* 2016;10:62.
- 440 [23] Tavakoli AV, Yun K. Transcranial Alternating Current Stimulation (tACS)  
441 Mechanisms and Protocols. *Front Cell Neurosci* 2017;11:214.
- 442 [24] Ridding M, Ziemann U. Determinants of the induction of cortical plasticity by  
443 non-invasive brain stimulation in healthy subjects. *The Journal of physiology*  
444 2010;588(13):2291-304.
- 445 [25] Nudo RJ. Functional and structural plasticity in motor cortex: implications for stroke  
446 recovery. *Physical Medicine and Rehabilitation Clinics* 2003;14(1):S57-S76.
- 447 [26] Khatoun A, Asamoah B, Mc Laughlin M. Simultaneously excitatory and inhibitory  
448 effects of transcranial alternating current stimulation revealed using selective pulse-train  
449 stimulation in the rat motor cortex. *J Neurosci* 2017:1390-17.
- 450 [27] Asamoah B, Khatoun A, Mc Laughlin M. tACS motor system effects can be caused  
451 by transcutaneous stimulation of peripheral nerves. *Nature communications* 2019;10(1):266.
- 452 [28] Kim K-T, Kim N, Kim H-K, Lee H, Gruner HN, Gergics P, et al. ISL1-based LIM  
453 complexes control Slit2 transcription in developing cranial motor neurons. *Sci Rep*  
454 2016;6:36491.
- 455 [29] Wada M, Yoshimi K, Higo N, Ren Y-R, Mochizuki H, Mizuno Y, et al. Statistical  
456 parametric mapping of immunopositive cell density. *Neurosci Res* 2006;56(1):96-102.
- 457 [30] Fang Q, Boas DA. Tetrahedral mesh generation from volumetric binary and  
458 grayscale images. *2009 IEEE International Symposium on Biomedical Imaging: From Nano*  
459 *to Macro*. Ieee; 2009:1142-5.
- 460 [31] Si H, Gärtner K. Meshing piecewise linear complexes by constrained Delaunay  
461 tetrahedralizations. *Proceedings of the 14th international meshing roundtable*. Springer;  
462 2005:147-63.
- 463 [32] Hines ML, Carnevale NT. The NEURON simulation environment. *Neural Comput*  
464 1997;9(6):1179-209.
- 465 [33] Seo H, Jun SC. Multi-Scale Computational Models for Electrical Brain Stimulation.  
466 *Front Hum Neurosci* 2017;11:515.
- 467 [34] Seo H, Jun SC. Relation between the electric field and activation of cortical neurons  
468 in transcranial electrical stimulation. *Brain Stimul* 2019;12(2):275-89.
- 469 [35] Rattay F. Analysis of models for external stimulation of axons. *IEEE Trans Biomed*  
470 *Eng* 1986(10):974-7.
- 471 [36] Bullitt E. Expression of c-fos-like protein as a marker for neuronal activity

- 472 following noxious stimulation in the rat. *J Comp Neurol* 1990;296(4):517-30.
- 473 [37] De Ridder D, De Mulder G, Menovsky T, Sunaert S, Kovacs S. Electrical stimulation  
474 of auditory and somatosensory cortices for treatment of tinnitus and pain. *Prog Brain Res*  
475 2007;166:377-88.
- 476 [38] Morrell MJ. Responsive cortical stimulation for the treatment of medically  
477 intractable partial epilepsy. *Neurology* 2011;77(13):1295-304.
- 478 [39] Treister R, Lang M, Klein MM, Oaklander AL. Non-invasive transcranial magnetic  
479 stimulation (TMS) of the motor cortex for neuropathic pain—at the tipping point? *Rambam*  
480 *Maimonides medical journal* 2013;4(4).
- 481 [40] Tremblay R, Lee S, Rudy B. GABAergic interneurons in the neocortex: from cellular  
482 properties to circuits. *Neuron* 2016;91(2):260-92.
- 483 [41] Wang X, Zhang C, Szábo G, Sun Q-Q. Distribution of CaMKII $\alpha$  expression in the  
484 brain in vivo, studied by CaMKII $\alpha$ -GFP mice. *Brain Res* 2013;1518:9-25.
- 485 [42] Gorman At. Differential patterns of activation of the pyramidal system elicited by  
486 surface anodal and cathodal cortical stimulation. *J Neurophysiol* 1966;29(4):547-64.
- 487 [43] Zwartjes DG, Heida T, Feirabend HK, Janssen ML, Visser-Vandewalle V, Martens  
488 HC, et al. Motor cortex stimulation for Parkinson's disease: a modelling study. *Journal of*  
489 *neural engineering* 2012;9(5):056005.
- 490 [44] Nitsche MA, Seeber A, Frommann K, Klein CC, Rochford C, Nitsche MS, et al.  
491 Modulating parameters of excitability during and after transcranial direct current stimulation  
492 of the human motor cortex. *The Journal of physiology* 2005;568(1):291-303.
- 493 [45] Lang N, Siebner HR, Ward NS, Lee L, Nitsche MA, Paulus W, et al. How does  
494 transcranial DC stimulation of the primary motor cortex alter regional neuronal activity in the  
495 human brain? *Eur J Neurosci* 2005;22(2):495-504.
- 496 [46] English DF, McKenzie S, Evans T, Kim K, Yoon E, Buzsáki G. Pyramidal cell-  
497 interneuron circuit architecture and dynamics in hippocampal networks. *Neuron*  
498 2017;96(2):505-20. e7.
- 499 [47] Braithwaite JJ, Mevorach C, Takahashi C. Stimulating the aberrant brain: Evidence  
500 for increased cortical hyperexcitability from a transcranial direct current stimulation (tDCS)  
501 study of individuals predisposed to anomalous perceptions. *Cortex* 2015;69:1-13.
- 502 [48] Seo H, Kim D, Jun SC. Effect of Anatomically Realistic Full-Head Model on  
503 Activation of Cortical Neurons in Subdural Cortical Stimulation-A Computational Study. *Sci*  
504 *Rep* 2016;6:27353.
- 505 [49] Seo H, Kim HI, Jun SC. The Effect of a Transcranial Channel as a Skull/Brain  
506 Interface in High-Definition Transcranial Direct Current Stimulation-A Computational Study.  
507 *Sci Rep* 2017;7:40612.
- 508 [50] Aspart F, Remme MW, Obermayer K. Differential polarization of cortical pyramidal  
509 neuron dendrites through weak extracellular fields. *PLoS Comput Biol* 2018;14(5):e1006124.
- 510 [51] Yi G-S, Wang J, Wei X-L, Tsang K-M, Chan W-L, Deng B, et al. Exploring how  
511 extracellular electric field modulates neuron activity through dynamical analysis of a two-  
512 compartment neuron model. *J Comput Neurosci* 2014;36(3):383-99.

513

514

515

516

517

518 **FIGURE LEGENDS**

519

520 **Figure 1. Schematic diagram of the experimental protocol and an example of cell density heat**

521 **map of c-Fos-positive cells.** (A) Experimental procedure for SEBS in Sprague Dawley rats. (B)

522 Image showing the customized transfer function for cell density maps of c-Fos-positive cells. EBS,

523 electrical brain stimulation

524

525 **Figure 2. High-resolution computed tomography scan based on an anatomically realistic rat**

526 **head model.** The anatomically realistic rat head model consisted of four layers of skin (A), skull (B),

527 cerebrospinal fluid (C), and brain (D). The electrodes are placed in accordance with the coordinates

528 used in the experiment (E), and a cross-section, following the black dotted line shown in (E), passing

529 the reference (F) and the active electrode (G) are shown.

530

531 **Fig. 3. Expression of c-Fos after sensory-parietal cortical stimulation.** (A) Cell-density maps for c-

532 Fos-positive cells at three bregma levels (+0.96, -3.60) in the sham operation group and the

533 experimental groups that received SEBS at 20, 40, 60, or 100 Hz (left), together with the atlas

534 reference section (right). (B) Automated cell counts in four regions of interest, i.e., the motor cortex,

535 sensory cortex, striatum, and thalamus. Comparing stimulated groups with the sham group showed

536 that SEBS increased cFos activity. SEBS at 40 Hz achieved the highest increment in c-Fos in the

537 motor and sensory cortex and SEBS at 20 Hz showed the highest increment of c-Fos in the thalamus.

538 The error bars represent the standard error of the mean. \* $p < 0.05$  and \*\*\* $p < 0.001$  compared with the

539 other study groups, one-way analysis of variance with Bonferroni post-hoc test. Scale bar: C, 3 mm.

540 EBS, electrical brain stimulation; n.s., not statistically significant

541

542 **Fig. 4. Histological confirmation of differential electrical stimulation and pattern of effect**  
543 **during cortical stimulation of the sensory parietal cortex for 1 week.** (A) Immunostaining of a rat  
544 cortex with CaMKII and c-Fos antibodies. CaMKII and c-Fos double-positive cells indicate activated  
545 excitatory neurons. (B) Immunostaining of a rat cortex with PV and c-Fos antibodies. PV and c-Fos  
546 double-positive cells indicate activated inhibitory neurons. (C) Quantification of the activated neuron  
547 ratio in the rat cortex in response to sinusoidal electrical stimulation at different frequencies, i.e., sham,  
548 20 Hz, 40 Hz, and 60 Hz. (D, E) Quantification of the ratio of activated neurons from the mean value  
549 for the rat cortex in the sham group in response to sinusoidal electrical stimulation at frequencies of  
550 20, 40, and 60 Hz. (D) Comparison between CaMKII and PV at specific frequencies. (E) Comparison  
551 between different frequencies according to specific regional cell type. The white arrow represents c-  
552 Fos and CaMKII or c-Fos and PV double-positive cells. The error bars represent the standard error of  
553 the mean. \* $p < 0.05$  and \*\*\* $p < 0.001$  compared with the control, one-way analysis of variance with  
554 Bonferroni post-hoc test. Scale bars: B, 500  $\mu\text{m}$  and 50  $\mu\text{m}$ . CaMKII, calmodulin-dependent protein  
555 kinase II; PV, parvalbumin; n.s., not statistically significant

556 **Fig. 5. Simulated current density distribution.** The spatial distributions of current density induced  
557 by 1V stimulus amplitude are visualized at the surface of the brain (A) and the cross-section passing  
558 the reference (B) and active (C) electrodes (following black dotted line shown in (A)) are shown.

559 **Fig. 6. Map showing the relationship between firing frequency and sinusoidal stimulation.** The  
560 spatial distributions of the firing rate for the inhibitory (A) and excitatory (B) neuron model induced  
561 by different stimulus amplitudes and stimulus frequencies are depicted. The firing rate is analyzed by  
562 action potentials (APs) efficiency, which define percentage action potentials per stimulation pulse. An  
563 APs efficiency value  $>1$  indicates burst, a value of 1 indicate phase lock, and a value of  $<1$  indicates  
564 intermittent firing behavior. The blue contour lines represent the 1:1 phase-locked firing region.

565 **Fig. 7. Simulated spatial distribution of firing rate.** The spatial distributions of the firing rate  
566 induced by a 1-V stimulus amplitude are visualized on the surface of the brain for excitatory and

567 inhibitory neurons by increasing the stimulus frequency in steps of 20 Hz.

# Graphical Abstract

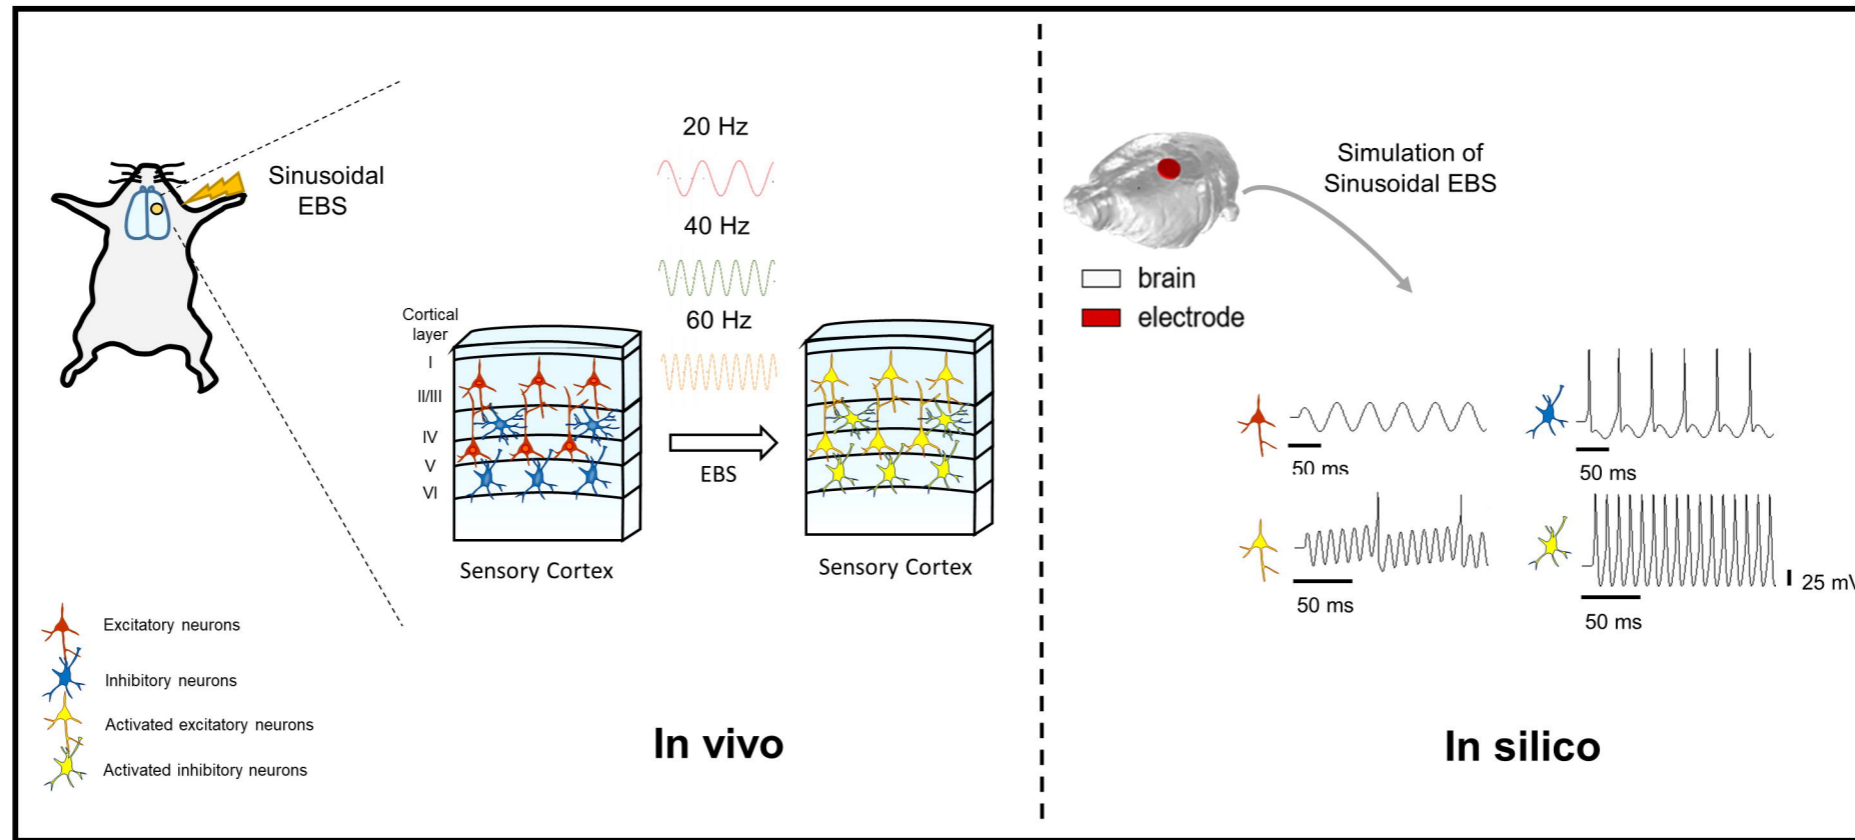



**Figure 1. Schematic diagram of experimental schedule and example cell density heat map of c-Fos positive cells.** (A) Experimental procedure of sinusoidal EBS in the SD rats. (B) Example image showed customized transfer function for Cell-density maps of c-Fos positive cells

Figure 1

A

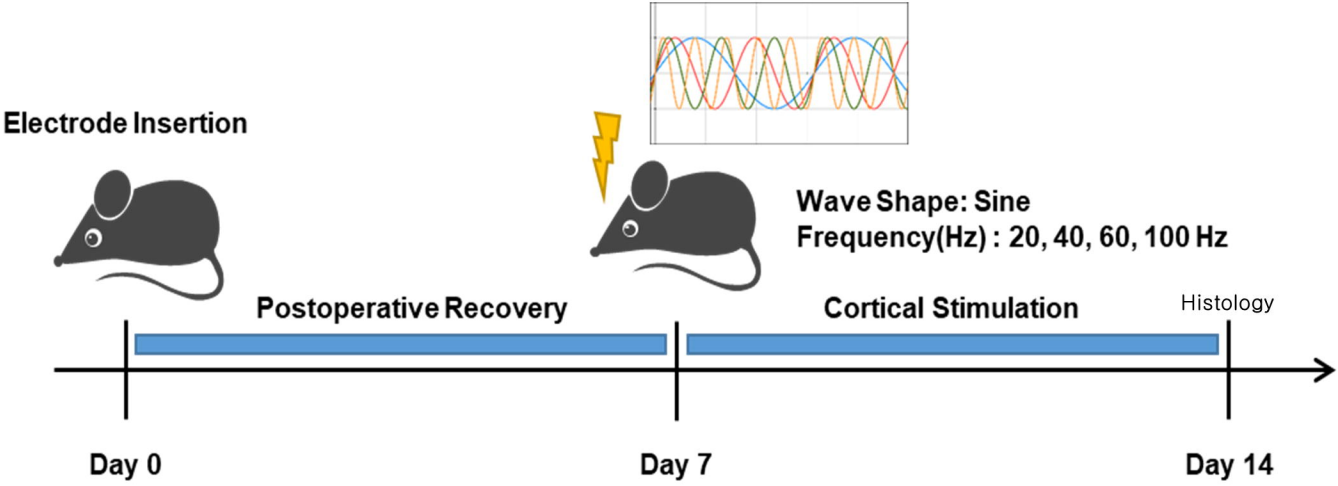

B

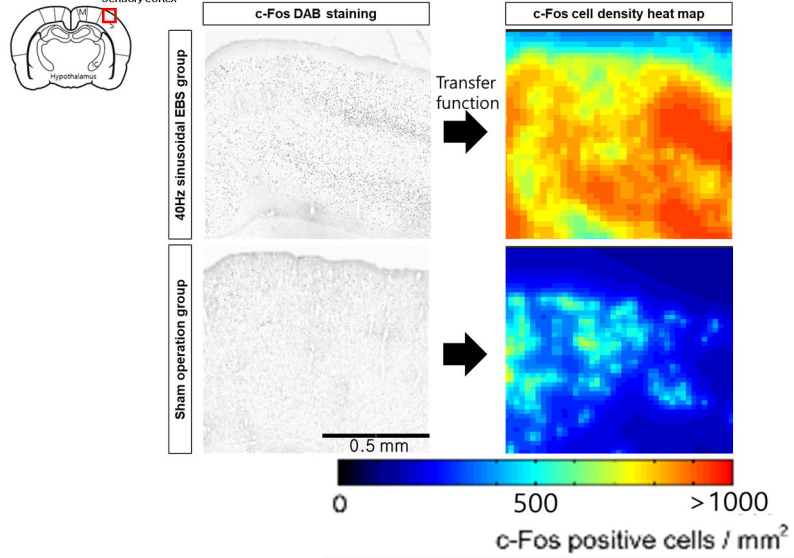

**Figure 2. High-resolution CT based anatomically realistic rat head model.** The anatomically realistic rat head model consisted of four layers of skin (a), skull (b), CSF (c), and brain (d). The electrode placement is placed in accordance to coordinates used in the experiment (e), and the cross-section (following black dotted line shown in (e)) passing the reference (f) and the active electrode (g) are shown.

Figure 2

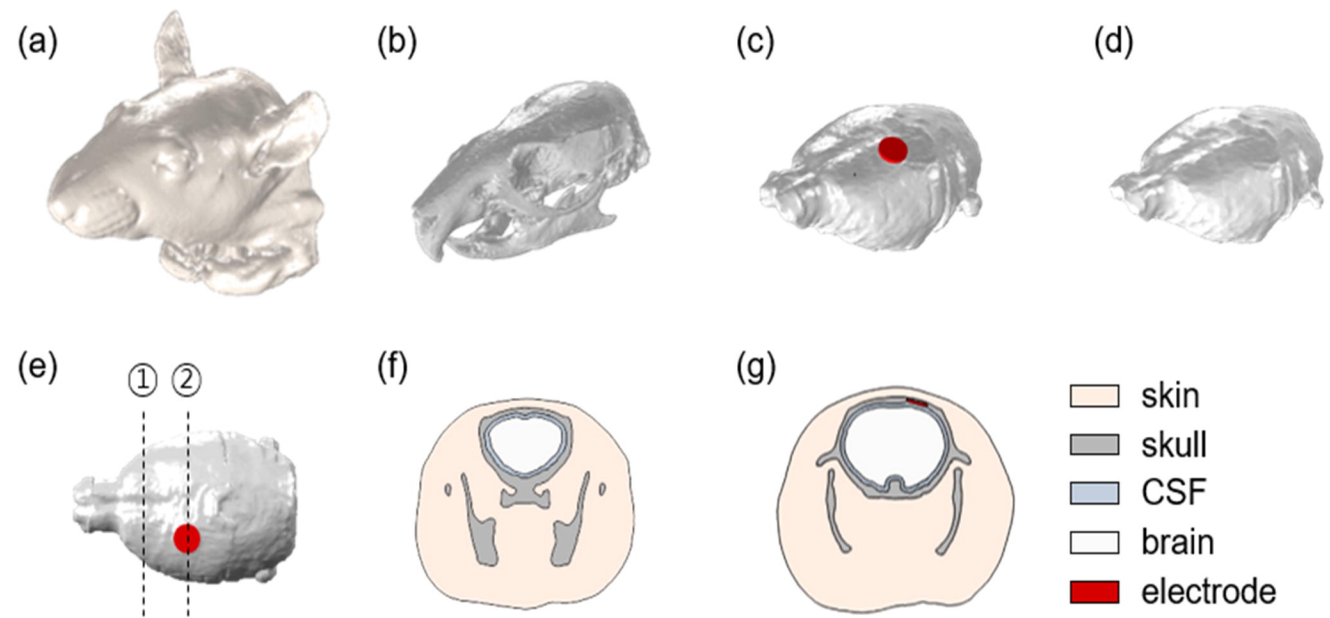

**Figure 3. Expression of c-Fos after sensory-parietal cortical stimulation.** (A) Cell-density maps for c-Fos-positive cells at three bregma levels (+0.96, -3.60) in the sham operation group and the experimental groups that received SEBS at 20, 40, 60, or 100 Hz (left), together with the atlas reference section (right). (B) Automated cell counts in four regions of interest, i.e., the motor cortex, sensory cortex, striatum, and thalamus. Comparing stimulated groups with the sham group showed that SEBS increased cFos activity. SEBS at 40 Hz achieved the highest increment in c-Fos in the motor and sensory cortex and SEBS at 20 Hz showed the highest increment of c-Fos in the thalamus. The error bars represent the standard error of the mean. \* $p < 0.05$  and \*\*\* $p < 0.001$  compared with the other study groups, one-way analysis of variance with Bonferroni post-hoc test. Scale bar: C, 3 mm. EBS, electrical brain stimulation; n.s., not statistically significant

Figure 3

A

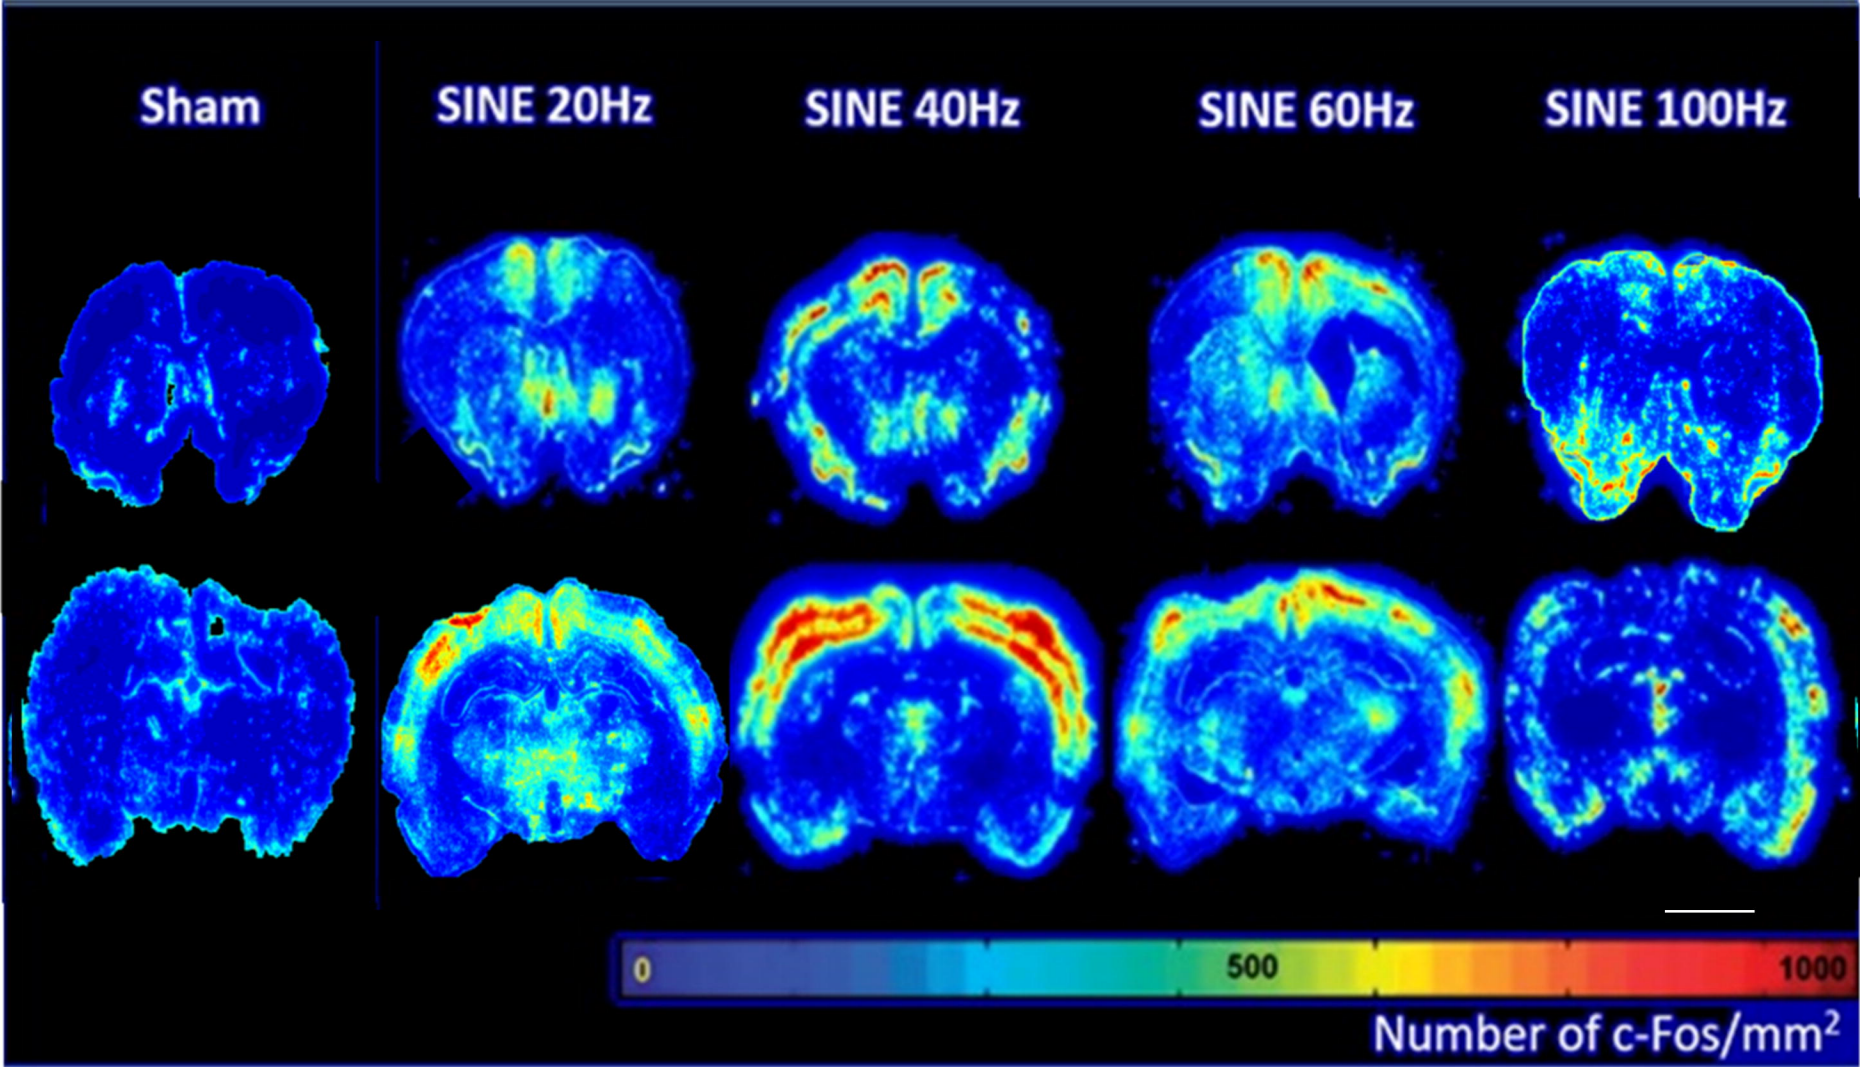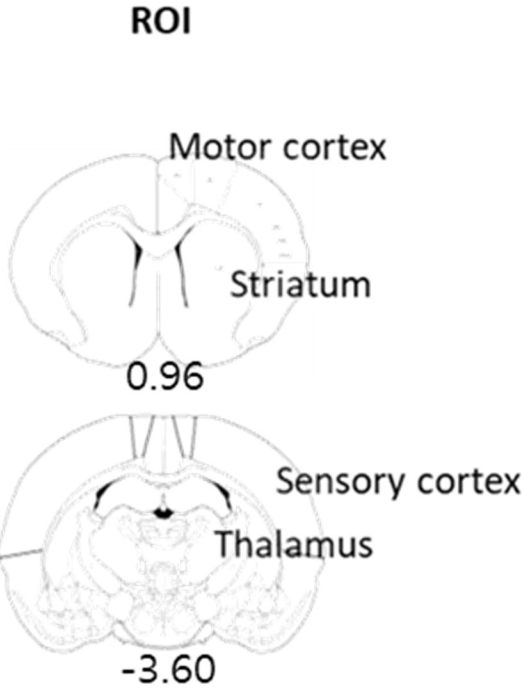

■ Ipsilesional  
■ Contralesional

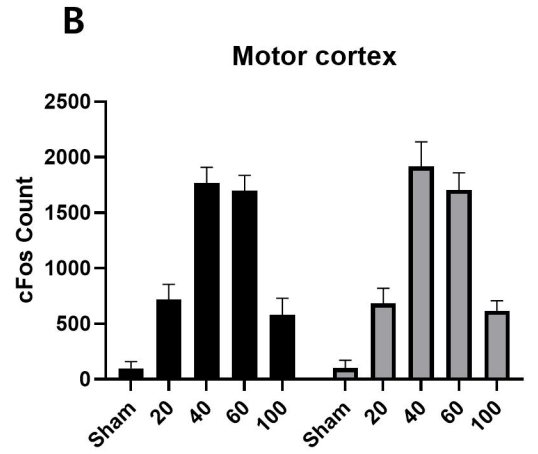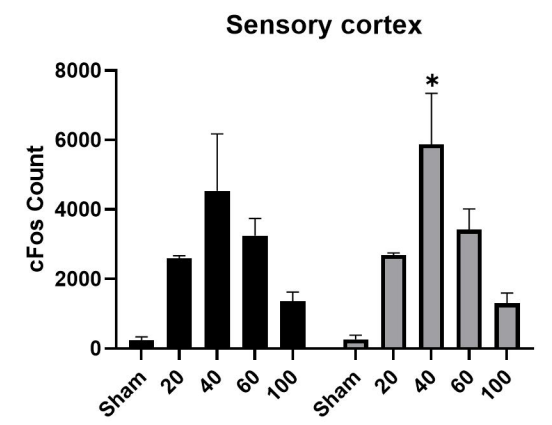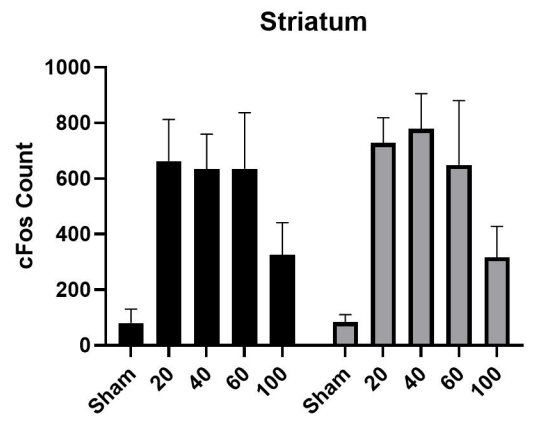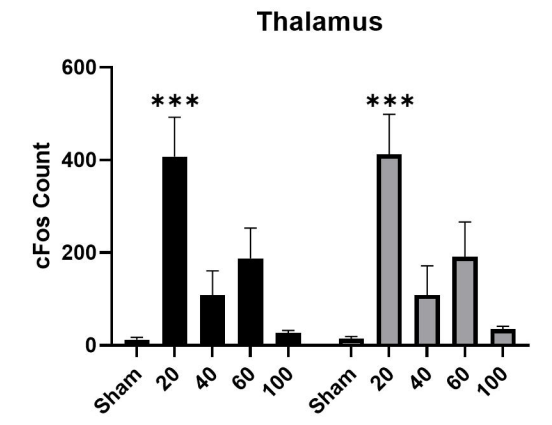

**Figure. 4. Histological confirmation of differential electrical stimulation and the pattern of effect during one week of cortical stimulation in sensory-parietal cortex.** (A) Immunostaining of a rat cortex with CaMKII and c-Fos antibodies. CaMKII and c-Fos double-positive cells indicate activated excitatory neurons. (B) Immunostaining of a rat cortex with PV and c-Fos antibodies. PV and c-Fos double-positive cells indicate activated inhibitory neurons. (C) Quantification of the activated neuron ratio in the rat cortex in response to sinusoidal electrical stimulation at different frequencies, i.e., sham, 20 Hz, 40 Hz, and 60 Hz. (D, E) Quantification of the ratio of activated neurons from the mean value for the rat cortex in the sham group in response to sinusoidal electrical stimulation at frequencies of 20, 40, and 60 Hz. (D) Comparison between CaMKII and PV at specific frequencies. (E) Comparison between different frequencies according to specific regional cell type. The white arrow represents c-Fos and CaMKII or c-Fos and PV double-positive cells. The error bars represent the standard error of the mean. \* $p < 0.05$  and \*\*\* $p < 0.001$  compared with the control, one-way analysis of variance with Bonferroni post-hoc test. Scale bars: B, 500  $\mu\text{m}$  and 50  $\mu\text{m}$ . CaMKII, calmodulin-dependent protein kinase II; PV, parvalbumin; n.s., not statistically significant



Figure 4

A

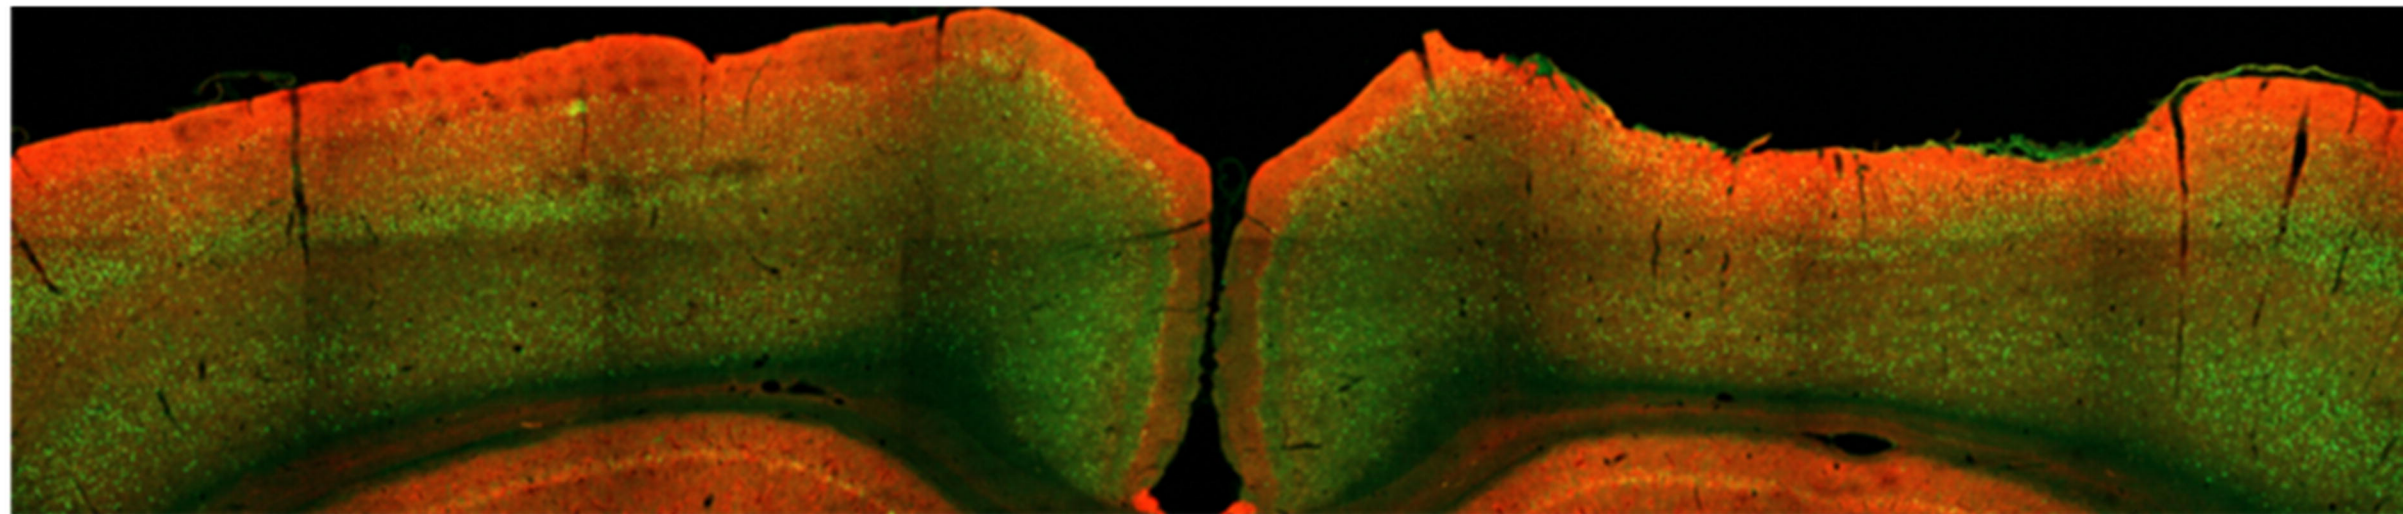

sham

20 Hz

40 Hz

60 Hz

c-Fos/CamKII

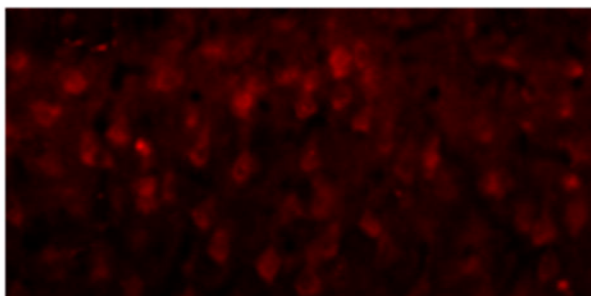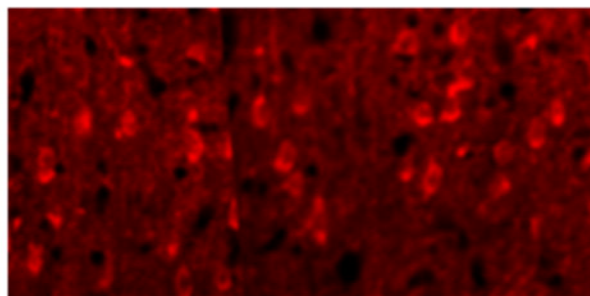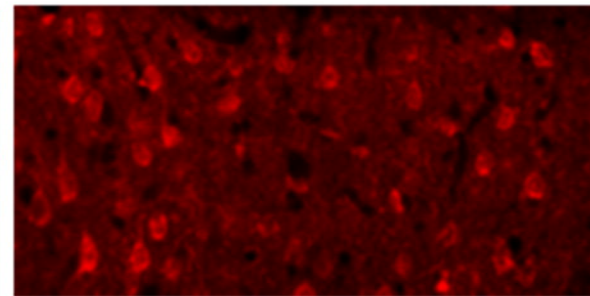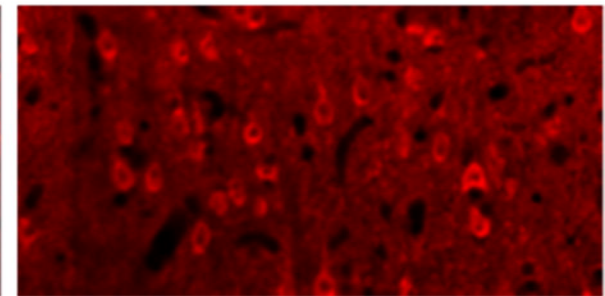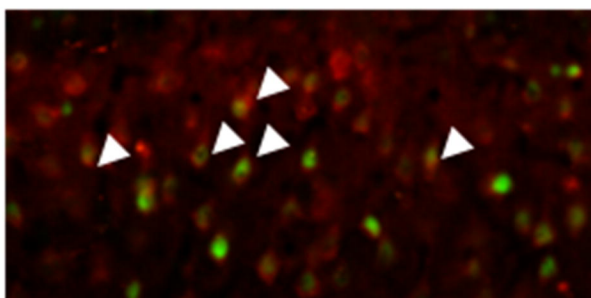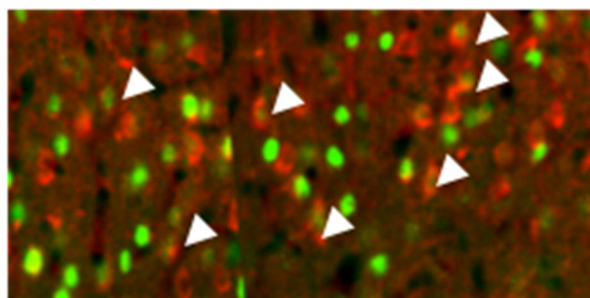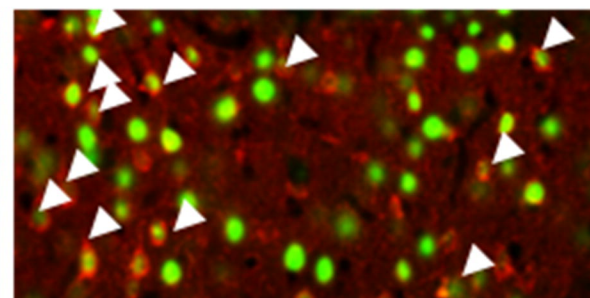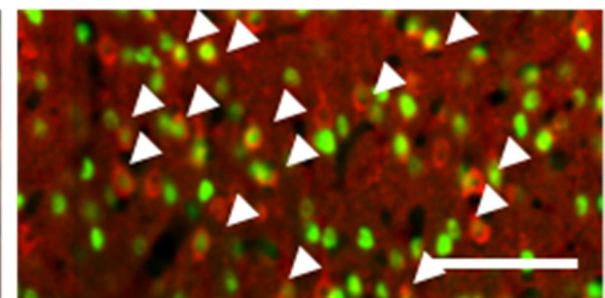

**B****c-Fos/PV**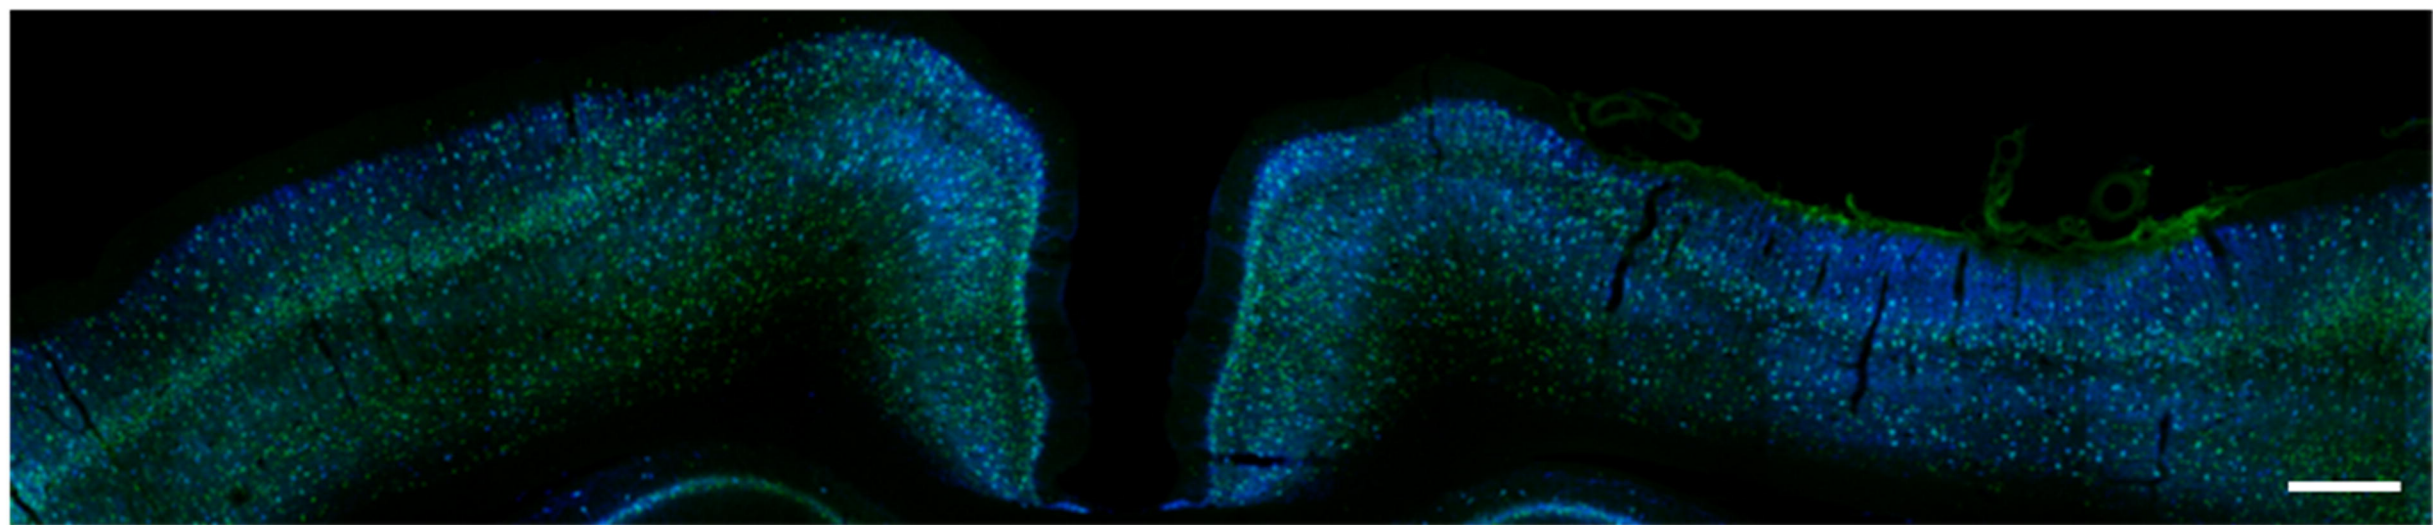

sham

20 Hz

40 Hz

60 Hz

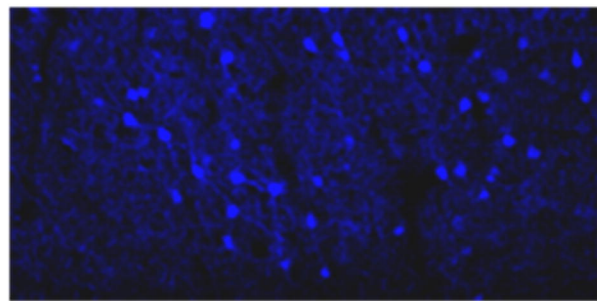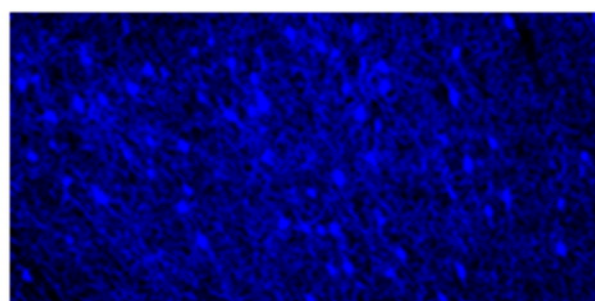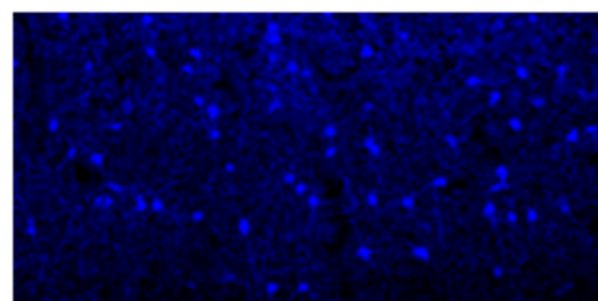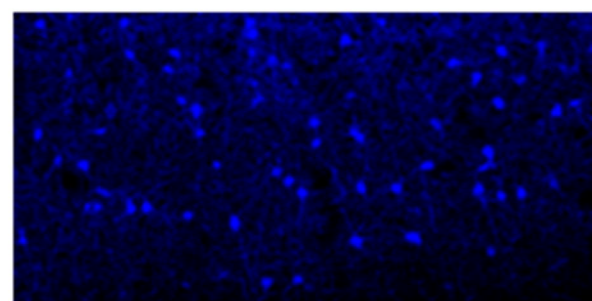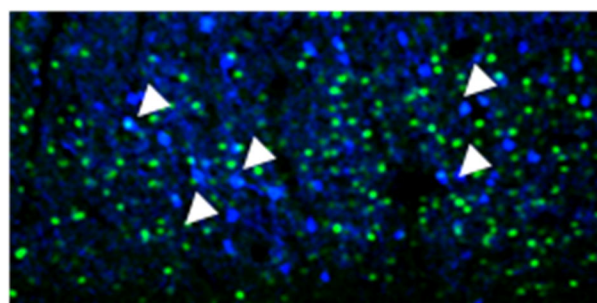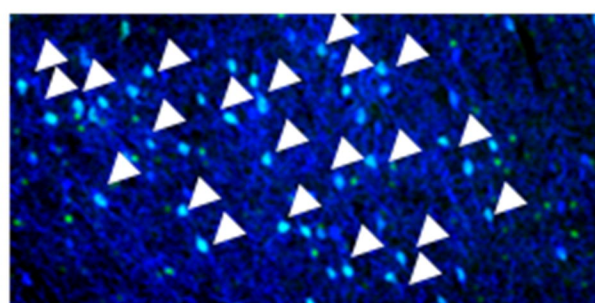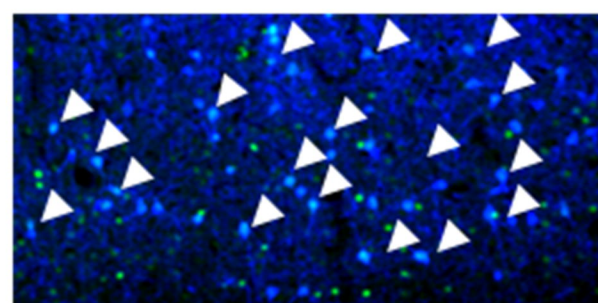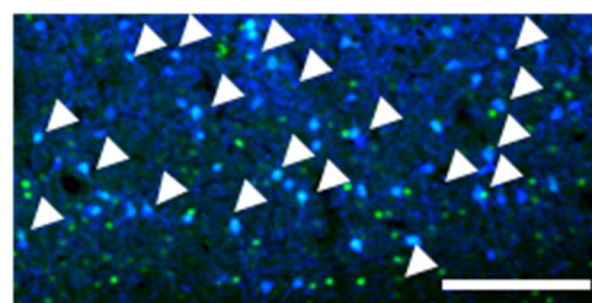

■ % of cFos+ CamKII+/total CamKII+ cells  
 ■ % of cFos+ PV+/total PV+ cells

Ipsilateral Side

Contralateral Side

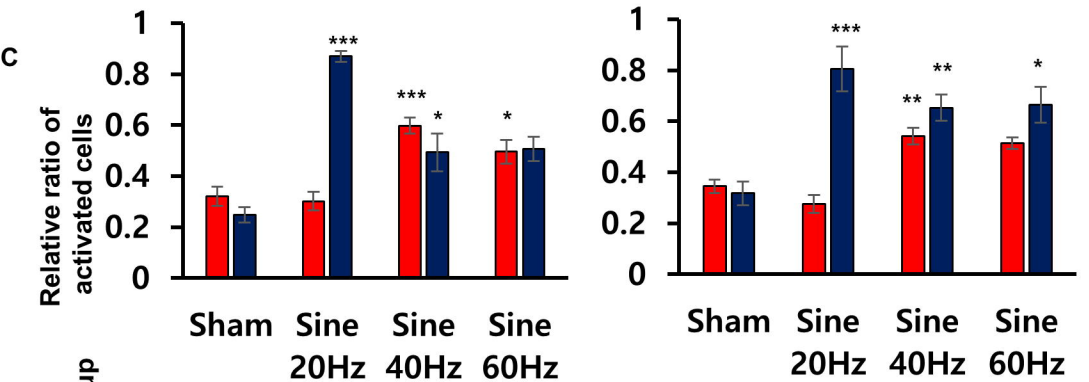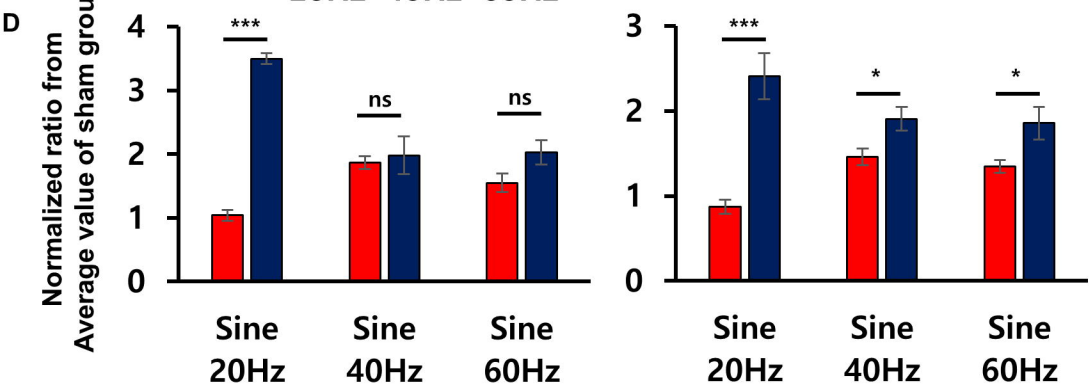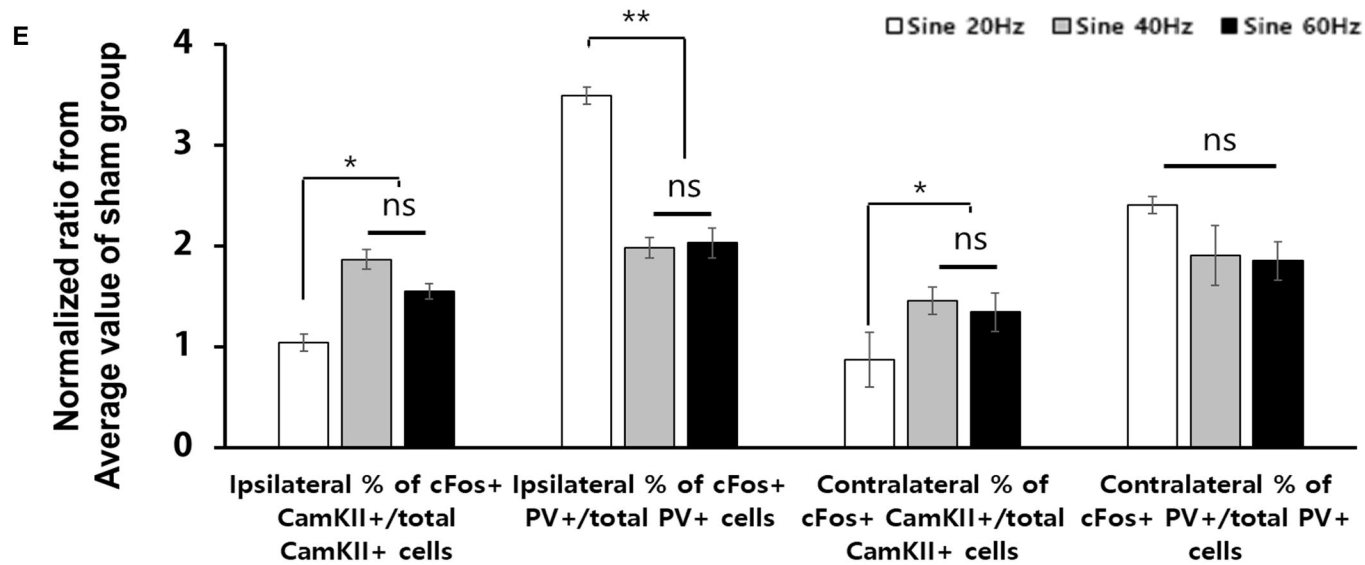

**Figure 5**

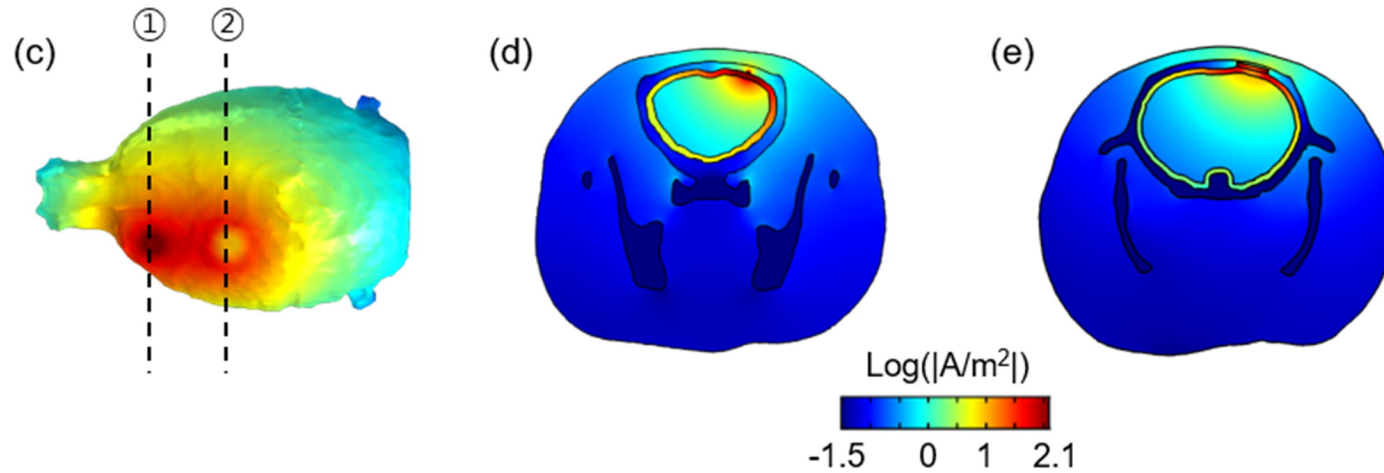

**Figure 5. Simulated current density distribution.** The spatial distributions of current density induced by 1V stimulus amplitude are visualized at the surface of the brain (c) and the cross-section passing the reference (d) and active (e) electrodes (following black dotted line shown in (c)) are shown.

**Figure 6**

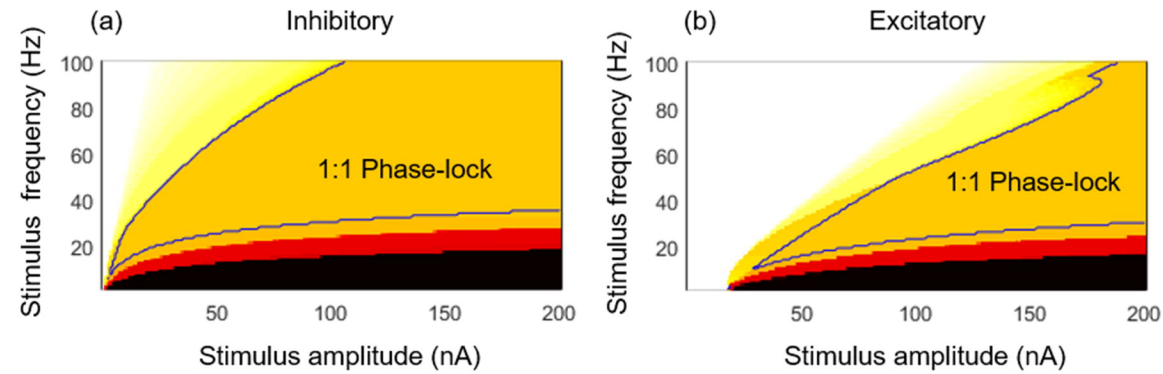

**Figure 6. Relation map between firing frequency and sinusoidal stimulation.** The spatial distributions of firing rate of inhibitory (a) and excitatory (b) neuron model induced by different stimulus amplitude and stimulus frequency are depicted. The firing rate is analyzed by action potentials (APs) efficiency and the blue contour lines represent 1:1 phase locked firing region.

**Figure 7**

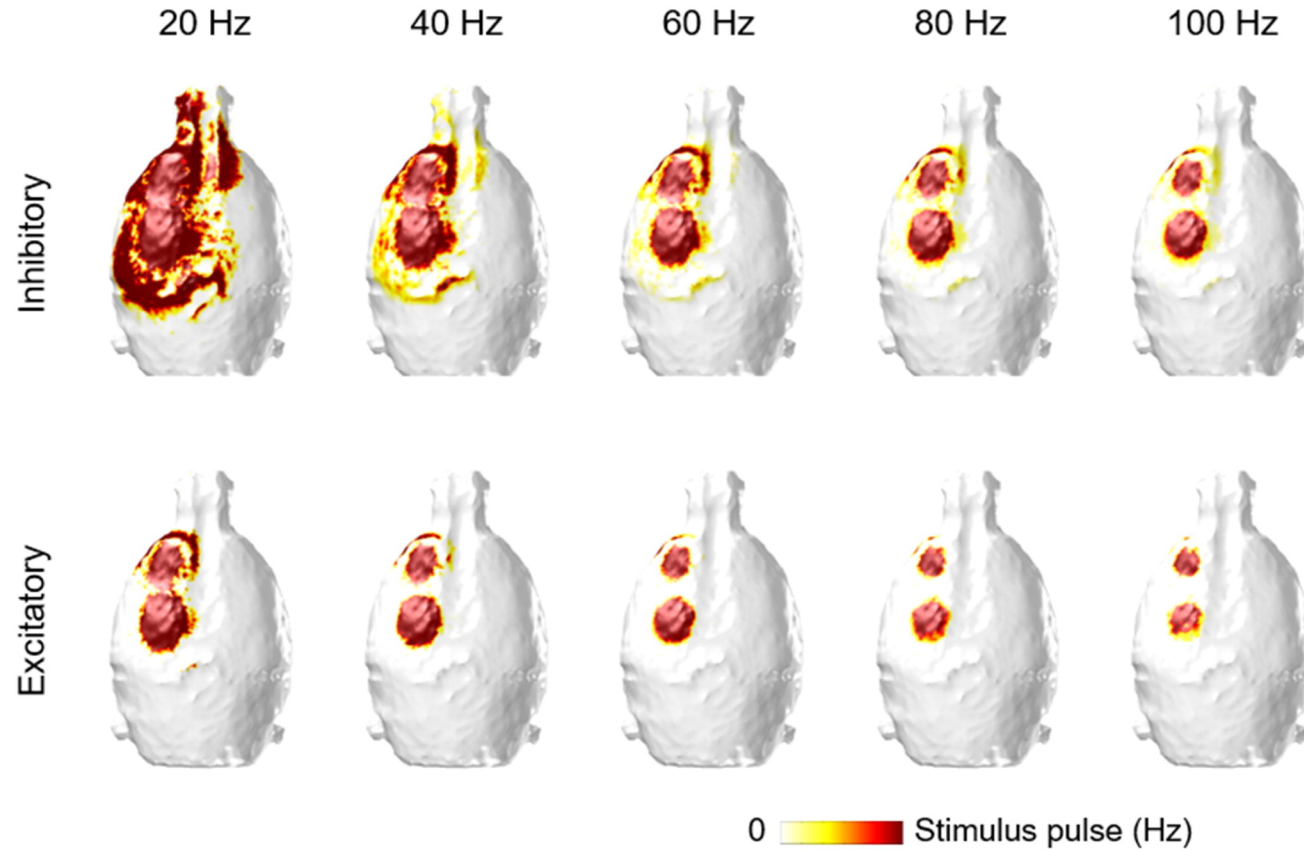

**Fig. 7. Simulated spatial distribution of firing rate.** The spatial distributions of firing rate induced by 1V stimulus amplitude are visualized at the surface of the brain for excitatory and inhibitory neurons by increasing stimulus frequency in steps of 20 Hz.

## Supplementary Figure S1

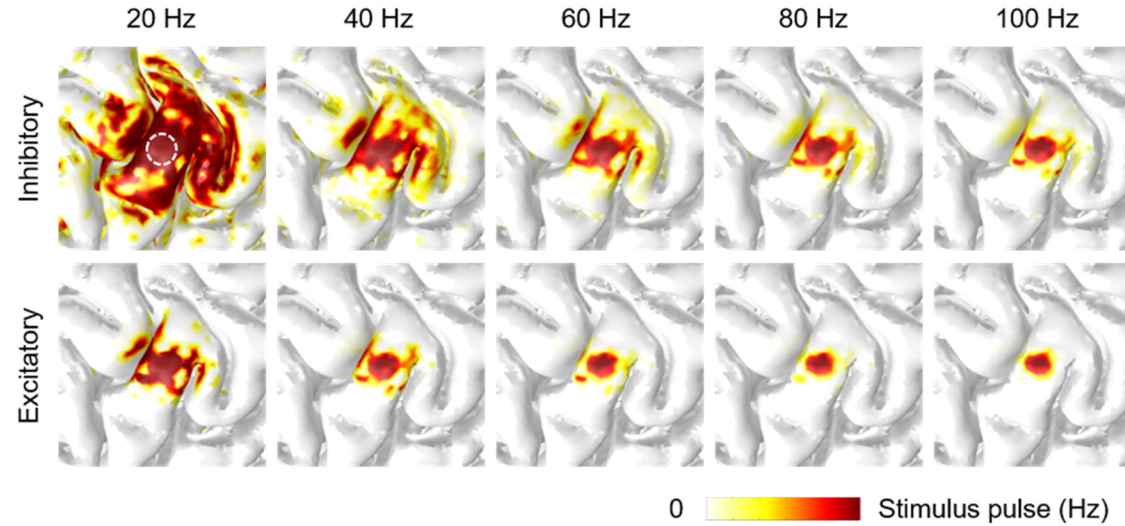

**Figure S1. Simulated spatial distribution of firing rate subject to the human model.**

Simulated spatial distribution of firing rate subject to the human model. The spatial distribution of firing rate induced by 1V stimulus amplitude are depicted at the cortical surface for excitatory and inhibitory neurons, by increasing stimulus frequency in steps of 20 Hz. The active electrode targeting sensory cortex is marked by white-colored and dotted line in 20 Hz stimulus-induced inhibitory neuronal responses.





## Supplementary Table 1

|                       | Ipsilateral  |                 |                 |                 |                  | Contralateral |                |                  |                  |                  |
|-----------------------|--------------|-----------------|-----------------|-----------------|------------------|---------------|----------------|------------------|------------------|------------------|
| unit: cells           | Sham (n=5)   | 20 Hz (n=4)     | 40 Hz (n=7)     | 60 Hz (n=4)     | 100 Hz (n=7)     | Sham (n=5)    | 20 Hz (n=4)    | 40 Hz (n=7)      | 60 Hz (n=4)      | 100 Hz (n=7)     |
| <b>Motor cortex</b>   | 98.4 ± 24.14 | 717 ± 59.85     | 1768.29 ± 49.61 | 1697 ± 60.72    | 577.86 ± 53.61   | 101.8 ± 28.06 | 683.75 ± 59.20 | 1916.57 ± 78.04  | 1706.25 ± 66.38  | 616 ± 32.10      |
| <b>Sensory cortex</b> | 245 ± 82.61  | 2595.25 ± 33.78 | 4539 ± 573.03   | 3248.5 ± 214.85 | 1554.14 ± 129.79 | 264.4 ± 47.28 | 2687 ± 27.17   | 5877.14 ± 513.63 | 3423.75 ± 256.16 | 1530.29 ± 124.85 |
| <b>Striatum</b>       | 80.2 ± 44.86 | 662.5 ± 65.23   | 634.43 ± 43.77  | 635 ± 87.39     | 326.29 ± 40.27   | 83.6 ± 10.59  | 727.5 ± 39.58  | 779 ± 44.31      | 648.75 ± 100.24  | 316.71 ± 39.04   |
| <b>Thalamus</b>       | 12.4 ± 4.45  | 407.25 ± 36.79  | 108.29 ± 18.31  | 187.75 ± 28.31  | 26.86 ± 1.94     | 14 ± 2.12     | 412 ± 37.60    | 108.57 ± 22.05   | 191.25 ± 32.55   | 35 ± 2.26        |

**Table S1. The number of c-Fos expression after sensory-parietal cortical stimulation.**

Automated cell counts of sham, 20, 40, 60, 100Hz group in four different regions of interest:

motor cortex, sensory cortex, striatum, thalamus. Comparing stimulated groups with sham

operation group showed that sinusoidal EBS increased c-Fos activity.
